# Supplementary material
Source: publisher figshare collection journal article supplement (https://acs.figshare.com/ndownloader/files/13659143)
Supplement: Supplementary file 1 [file 13659143]

# Combined Numerical and Experimental Investigation of Localized Electroporation-Based Cell Transfection and Sampling

Prithvijit Mukherjee<sup>1, 2, \*</sup>, S. Shiva P. Nathangari<sup>1, 2, \*</sup>, John A. Kessler<sup>3</sup>, Horacio D. Espinosa<sup>1, 2, 4</sup>

<sup>1</sup>Department of Mechanical Engineering, Northwestern University, Evanston IL-60208, United States

<sup>2</sup>Theoretical and Applied Mechanics Program, Northwestern University, Evanston IL-60208, United States

<sup>3</sup>Department of Neurology, Northwestern University, Chicago, IL-60611, United States

<sup>4</sup>Corresponding author: [espinosa@u.northwestern.edu](mailto:espinosa@u.northwestern.edu), \*equal contribution

**Supporting Information Table 1: Parameters used in Lumped Circuit Model**

|       |                                                                             |
|-------|-----------------------------------------------------------------------------|
| $W$   | $R_g / (R_g + R_{cy})$                                                      |
| $X$   | $WR_{cy} + R_{cp} + R_{op}$                                                 |
| $Y$   | $R_s + R_{op} \left(1 - R_{op}/X\right)$                                    |
| $Z$   | $1 - R_{cy} / (R_g + R_{cy})$                                               |
| $n_1$ | $1 / (YC_c)$                                                                |
| $n_2$ | $-1/C_c \left(1/R_c + 1/Y\right)$                                           |
| $n_3$ | $-WR_{op} / (XYC_c)$                                                        |
| $n_4$ | $ZR_{op} / (XYC_t)$                                                         |
| $n_5$ | $-1/C_t \left(1/R_t + ZR_{op}^2 W / X^2 Y + WZ/X + 1/(R_g + R_{cy})\right)$ |
| $n_6$ | $-1/C_t \left(ZR_{op}^2 W / X^2 Y + WZ/X + 1/(R_g + R_{cy})\right)$         |
| $n_7$ | $ZR_{op} / (XYC_b)$                                                         |

|       |                                                                               |
|-------|-------------------------------------------------------------------------------|
| $n_8$ | $-1/C_b \left( ZR_{op}^2 W / X^2 Y + WZ/X + 1/(R_g + R_{cy}) \right)$         |
| $n_9$ | $-1/C_b \left( 1/R_b + ZR_{op}^2 W / X^2 Y + WZ/X + 1/(R_g + R_{cy}) \right)$ |

### Supporting Information S1: Coupling between Electric Field and Pore Evolution Equations

The formation of electro-pores leads to a change in the conductivity of the cell membrane. This is incorporated in the model by modifying the cell membrane resistances  $R_t$  and  $R_b$  at every time step based on the distribution of electropores obtained from the Smoluchowski equation. The total cell membrane resistance is given by –

$$1/R = 1/R_m + \sum 1/R_p \quad (1)$$

Here,  $R$  is the total membrane resistance  $(d_m/\kappa A)$  where  $d_m$  is the thickness of the cell membrane,  $\kappa$  is the effective cell membrane conductivity and  $A$  is the total area of the cell membrane. In our case  $R$  is  $R_t$  or  $R_b$ .  $R_m$  is the resistance of the cell membrane and  $R_p$  is the resistance of one electro-pore. The summation is over all the electro-pores present at a particular time.

We have,  $R_m = R'_m / (1 - A_f)$ ; where  $R'_m$  is the resistance of the intact cell membrane without electro-pores and  $A_f$  is the area fraction of the membrane covered by electro-pores present at a particular time step. For our model  $R'_m = d_m / \kappa' A$  and  $A_f = \int_{r_{min}}^{r_{max}} n \pi r_p^2 dr_p$  where  $\kappa'$  is the conductivity of the intact cell membrane. The overall resistance of an electro-pore is given by  $R_p = d_m / (2\kappa_p A_p H_p K_p + 1/2\kappa_p r_p)$  where  $\kappa_p$  is the pore conductivity,  $A_p$  is the area of the pore and  $H_p$  and  $K_p$  are the hindrance and partition factors respectively.<sup>1</sup>

## Supporting Information S2: Hydrophilic Pore Energy and Tension Coupled Pores

The energy difference ( $E$ ) between an intact lipid bilayer membrane and one with a hydrophilic electro-pore as a function of the radius of the pore ( $r_p$ ) is given by –

$$E(r_p) = \beta \left( \frac{r_{min}}{r_p} \right)^4 + 2\pi\gamma r_p - \sigma_e \pi r_p^2 - \int_{r_{min}}^{r_p} F(r', V_m) dr' \quad (2)$$

The first term arises due to the steric repulsion between lipid heads with  $\beta$  representing the steric repulsion energy.<sup>2</sup> The second term is due to the line tension along the pore perimeter where  $\gamma$  is the edge energy.<sup>3</sup> The third term accounts for the reduction of membrane tension and consequently the membrane energy due to the formed pore with  $\sigma_e$  being the effective membrane tension.<sup>4</sup> The final term which takes the form of work done by an electric field on a dielectric body is the contribution of the TMP ( $V_m$ ) in reducing the energy.<sup>5</sup> The non-linear form of the effective membrane tension ( $\sigma_e$ ) which couples the electro-pores is given by-<sup>4</sup>

$$\sigma_e = 2\sigma' - \frac{2\sigma' - \sigma}{(1 - A_f)^2} \quad (3)$$

Here,  $\sigma'$  is the energy of the hydrocarbon-water interface,  $\sigma$  is the surface tension of the membrane without pores and  $A_f$  is the area fraction of pores as discussed before. The function  $F(r, V_m)$ , which represents the electric force is given by-<sup>5</sup>

$$F(r, V_m) = \frac{F_{max}}{1 + r_h/(r + r_t)} V_m^2 \quad (4)$$

Where,  $F_{max}$ ,  $r_h$  and  $r_t$  are constants.

### Supporting Information S3: Pore Creation and Destruction Rates

The Smoluchowski equation is solved in the pore radius space to obtain the pore distribution at every time step. At the minimum radius ( $r_m$ ) an Arrhenius-type expression is used as the boundary condition to account for the nucleation and destruction of electro-pores-<sup>6</sup>

$$-\left(D_p \frac{\partial n}{\partial r_p} + \frac{D_p}{kT} n \frac{\partial E}{\partial r_p}\right) = A e^{\frac{B V_m^2}{kT}} - \nu n \quad (5)$$

Here,  $A$  is the pore creation rate density,  $B$  is the pore creation constant and  $\nu$  is the pore destruction constant derived by assuming an absorption condition slightly below  $r_{min}$ .<sup>1</sup>

At the maximum radius ( $r_{max}$ ), a no flux boundary condition is used-

$$D_p \frac{\partial n}{\partial r_p} + \frac{D_p}{kT} n \frac{\partial E}{\partial r_p} = 0 \quad (6)$$

### Supporting Information S4: Hindrance and Partition

Due to the finite size and charge of a molecule, their transport through a pore in a dielectric media is impeded as compared to the bulk electrolyte. The hindrance and partition factors are introduced to account for the impeded transport.

A spherical molecule of finite size is obstructed due to the decreased effective area of pore available for transport and drag from the pore walls.<sup>7,8</sup> The hindrance factor  $H_p$  is a continuum approximation that accounts for these effects –

$$H_p = f_A f_D \quad (7)$$

Here,  $f_A$  is the area factor and  $f_D$  drag factor. The area factor  $f_A$  is given by –

$$f_A = \left(1 - \frac{r_s}{r_p}\right)^2 \quad (8)$$

Where,  $r_s$  is the radius of the molecule and  $r_p$  is the radius of the pore.

The drag factor  $f_D$  is given by –

$$f_D = \frac{6\pi}{f_t} \quad (9)$$

Where  $f_t$  is –

$$f_t = \frac{9}{4} \pi^2 \sqrt{2} (1 - \lambda)^{-\frac{5}{2}} (1 + a_1(1 - \lambda) + a_2(1 - \lambda)^2) + a_3 + a_4\lambda + a_5\lambda^2 + a_6\lambda^3 + a_7\lambda^4 \quad (10)$$

Here,  $\lambda = r_s/r_p$ . The constants  $a_1$  to  $a_7$  are provided in Supporting Information Table 3.

The partition factor accounts for the non-ohmic behavior of a pore formed in a membrane that affects the transport of charged specie across it. The electrostatic interaction of a charged molecule with the pore wall leads to higher energy of the molecule inside the dielectric membrane pore as compared to the bulk electrolyte, as shown by Parsegian.<sup>9</sup> Thus, there is an energy barrier hindering the transport of charged molecules into the membrane pores, which increases with decreasing pore size. Assuming a trapezoidal energy profile inside a membrane pore, Chernomordik et al.<sup>10</sup> developed an equation for the partition function  $K_p$  –

$$K_p = \frac{e^{\Delta\psi_m} - 1}{\frac{w_0 e^{w_0 - n_r \Delta\psi_m} - n_r \Delta\psi_m}{w_0 - n_r \Delta\psi_m} e^{\Delta\psi_m} - \frac{w_0 e^{w_0 + n_r \Delta\psi_m} + n_r \Delta\psi_m}{w_0 + n_r \Delta\psi_m}} \quad (11)$$

Here,  $n_r$  is the relative entrance length of the pore and  $\Delta\psi_m$  is the dimensionless transmembrane potential –

$$\Delta\psi_m = \frac{ez}{kT} V_m \quad (12)$$

Where,  $e$  is the electronic charge,  $z$  is the valency of the molecule of interest and  $V_m$  is the transmembrane potential.

In equation 7,  $w_0$  is the Born Energy,<sup>6, 9</sup> which in this context is the energy required to place a unit charge from the bulk medium into the dielectric membrane pore –

$$w_0 = 5.3643 \frac{(ez)^2}{kT} r_p^{-1.803} \quad (13)$$

### **Supporting Information S5: Verification of Multiphysics Model**

The Boltzmann distribution satisfies the steady state Smoluchowski equation.<sup>11</sup> In order to verify the model, the normalized pore distribution ( $n/\sum n$ ) at steady state, obtained from the numerical simulation, was compared to the analytical Boltzmann distribution ( $e^{-E/kT}/\sum e^{-E/kT}$ ) where,  $E$  is the hydrophilic pore energy calculated using equation 2. We found close agreement of the two solutions (see **Supporting Information Figure 6**). The pore distribution ( $n$ ) obtained from the numerical simulation was also plotted for different mesh sizes and the solutions were found to converge (see **Supporting Information Figure 6**). The mesh element size was fixed at 0.05 nm, which ensured that the Peclet Number is  $<1$  and no numerical instability is encountered while solving the Smoluchowski equation.

## Supporting Information Table 2: Parameters used in Pore Evolution Equation

Parameters for the model are obtained from relevant literature.<sup>1, 4</sup> The important parameters used in the model are listed below -

| PARAMETER                                       | VALUE                                              |
|-------------------------------------------------|----------------------------------------------------|
| $\kappa'$ , Membrane conductivity               | $5 \times 10^{-7}$ S/m                             |
| $\kappa_p$ , Pore conductivity                  | 1 S/m                                              |
| $d_m$ , cell membrane thickness                 | 5 nm                                               |
| $r_{min}$ , Minimum electro-pore radius         | 0.65 nm                                            |
| $r_{max}$ , Maximum electro-pore radius         | 15 nm                                              |
| $\beta$ , Steric repulsion energy               | $1.4 \times 10^{-19}$ J                            |
| $\gamma$ , Edge energy                          | $2 \times 10^{-11}$ J m <sup>-1</sup>              |
| $\sigma$ , Initial membrane tension             | Varied over a range (see main text)                |
| $\sigma'$ , Hydrocarbon-water interface tension | $20 \times 10^{-3}$ J m <sup>-2</sup>              |
| $F_{max}$ , Maximum electric force              | $6.9 \times 10^{-10}$ N/V <sup>2</sup>             |
| $r_h$ , Electric force constant                 | 0.95 nm                                            |
| $r_t$ , Electric force constant                 | 0.23 nm                                            |
| $D_p$ , Pore diffusion coefficient              | $2 \times 10^{-13}$ m <sup>2</sup> s <sup>-1</sup> |
| $A$ , Pore creation rate density                | $1 \times 10^9$ m <sup>-2</sup> s <sup>-1</sup>    |
| $B$ , Pore creation constant                    | 20 kT/V <sup>2</sup>                               |
| $T$ , Temperature                               | 310 K                                              |
| $D$ , Diffusion coefficient of molecule         | $3 \times 10^{-11}$ m <sup>2</sup> s <sup>-1</sup> |

**Supporting Information Table 3: Parameters used in Transport Equation**

| PARAMETER                        | VALUE    |
|----------------------------------|----------|
| $r_s$ , Radius of molecule       | 3 nm     |
| $a_1$                            | -1.2167  |
| $a_2$                            | 1.5336   |
| $a_3$                            | -22.5083 |
| $a_4$                            | -5.6117  |
| $a_5$                            | -0.3363  |
| $a_6$                            | -1.2160  |
| $a_7$                            | 1.6470   |
| $n_r$ , Relative entrance length | 0.25     |

**Supporting Information Figure 1: Nanochannel density and cell confluency affect electroporation efficiency**

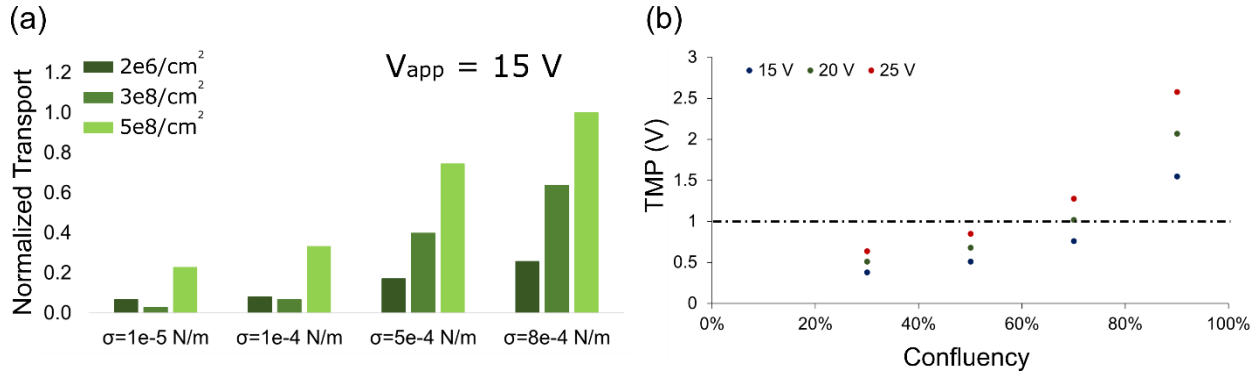

**Supporting Information Figure 1: Effect of nanochannel density and cell confluency** (a) The normalized transport is plotted for polycarbonate substrates with different nanochannel densities for varying membrane tensions. The transport is found to increase with increasing nanochannel density. The applied voltage is 15 V, (b) The TMP obtained from the equivalent circuit model without pore evolution is plotted as a function of cell confluency for different applied voltages. It is found that the confluency should be above ~80% for the TMP to exceed the critical value of 1 V. The nanochannel density used in these calculations is  $5e8/\text{cm}^2$ .



## Supporting Information Figure 2: Transport of small molecules (PI) is insensitive to the membrane tension

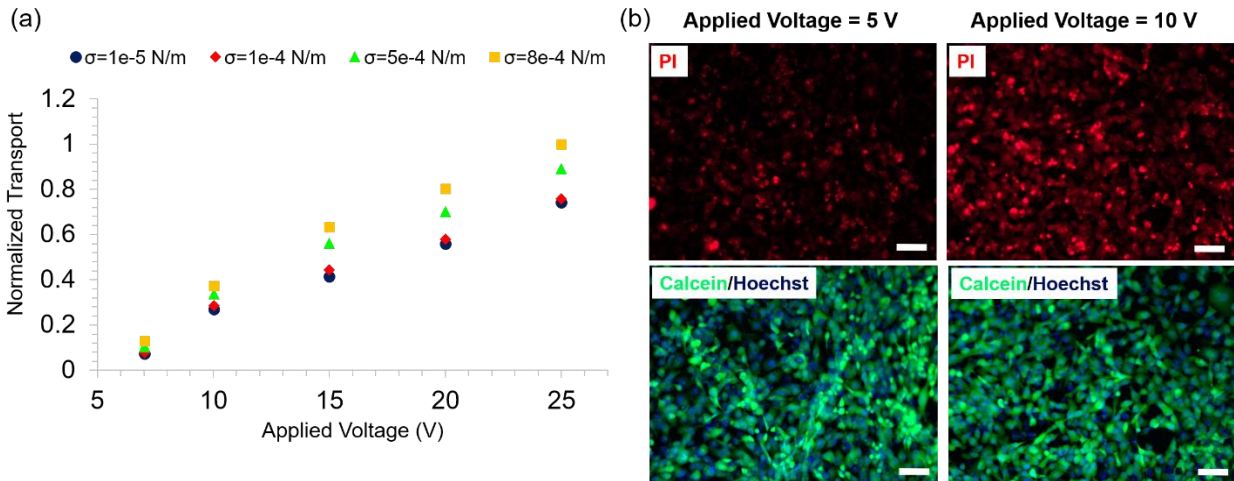

**Supporting Information Figure 2: Transport of Small Molecules** (a) The normalized transport obtained from the simulations is plotted against the applied far-field voltage ( $V_{app}$ ) for different values of membrane tension ( $\sigma$ ). The transport of small molecules increases linearly with  $V_{app}$  and shows lower sensitivity with increasing  $\sigma$  as compared to that of large molecules, (b) PI is delivered into HT 1080 cells under iso-osmolar conditions. Top fluorescence images show the delivery of PI at two different applied voltages (5 V and 10 V). The fluorescence intensity is enhanced with an increase in  $V_{app}$  from 5 V to 10 V indicating increased transport. Bottom fluorescence images indicate the corresponding cell viability (>95%) after 6 hours using live dead staining.

## Supporting Information Figure 3: Transfection of mCherry plasmid in HT 1080 cells under different voltage amplitudes

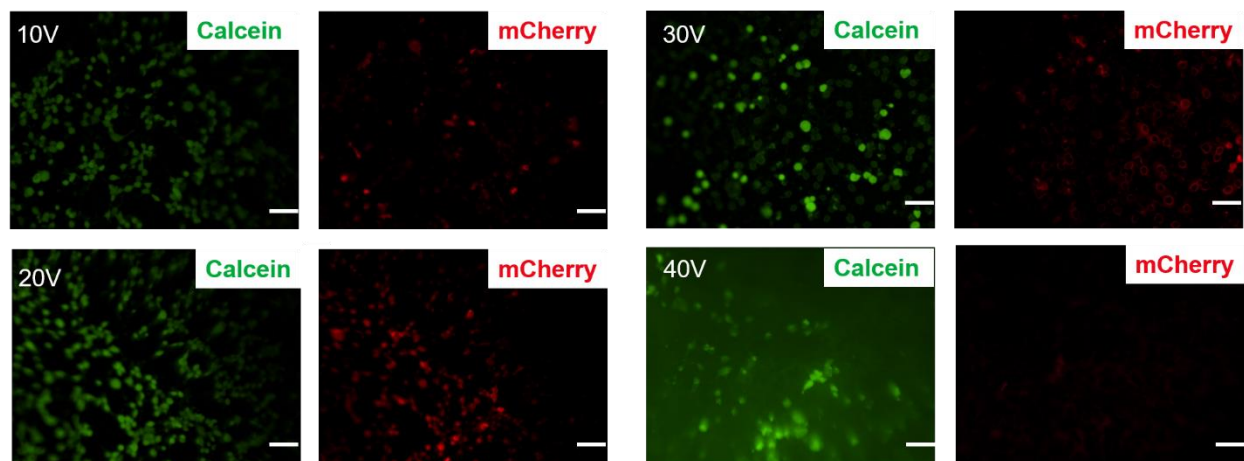

**Supporting Information Figure 3: The transfection efficiency of mCherry plasmid** (1 day after electroporation) and cell-viability in HT 1080 cells were investigated under various voltage amplitudes. The cell-viability and transfection efficiency were optimal for 30 V. Scale bars = 50  $\mu$ m in all images.

**Supporting Information Figure 4: Small pores remain open even after the electroporation pulse as predicted by the model and inferred from the quenching of Calcein AM in CHO cells**

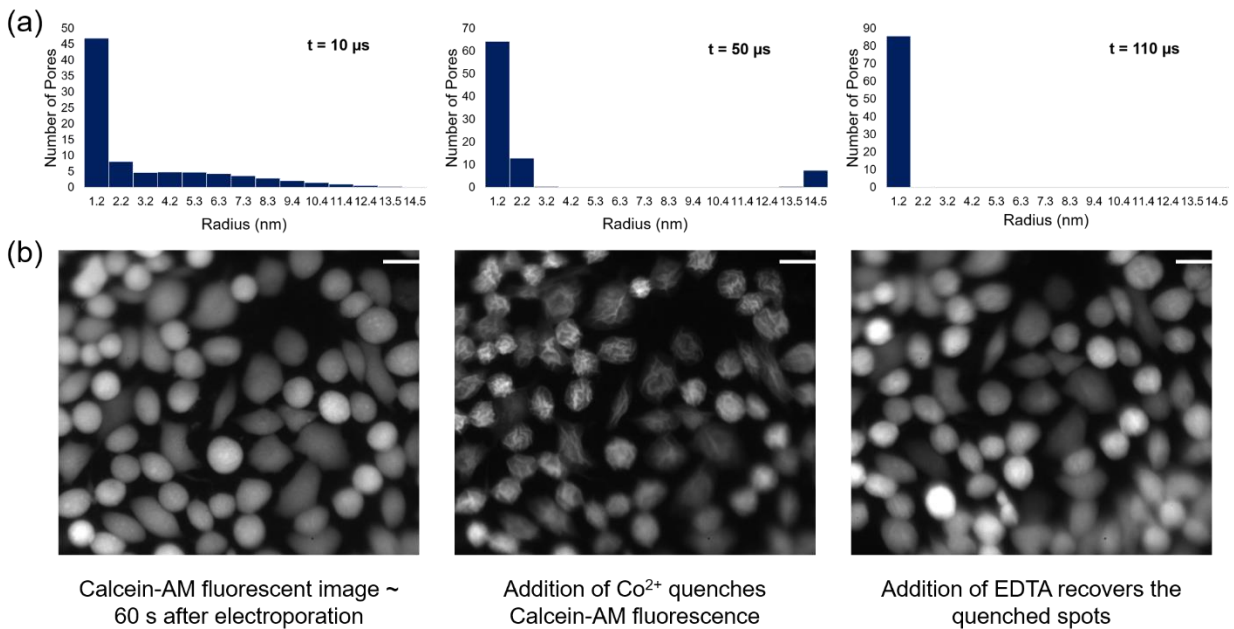

**Supporting Information Figure 4:** Existence of small pores post pulsation (a) Histogram of pore sizes for a 10 V pulse of 100  $\mu\text{s}$  duration at  $1\text{e-}5$  N/m membrane tension. Large pore ( $> 3$  nm) populations exist during the pulse (Left and Middle). Only a population of small pores ( $< 1.5$  nm) remain after the pulse (Right), (b)  $\text{Co}^{2+}$  is introduced into electroporated CHO cells approximately 1 minute after the pulse ends. The addition of  $\text{Co}^{2+}$  results in a quenching of the green fluorescence signal, which is later recovered ( $\sim 3$  mins) by introducing a chelating buffer (EDTA). The quenching and subsequent recovery indicate that small pores remain open even after the pulse has ended. Scale bars = 30  $\mu\text{m}$

**Supporting Information Figure 5: Cell viability is low at higher voltage amplitudes**

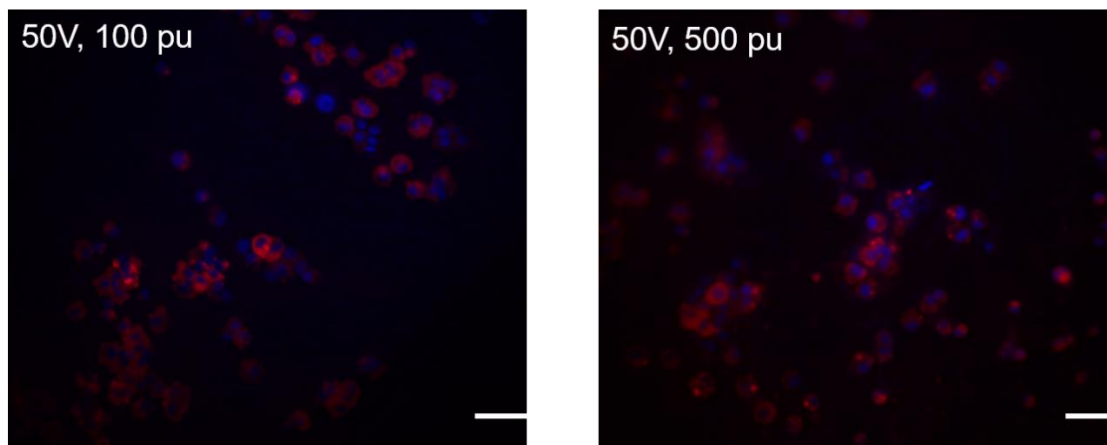

**Supporting Information Figure 5:** At higher voltage amplitudes (50V for the images shown here), most cells lifted on day 1. Further, the cell morphology looked abnormal. The composite images show tdTomato expression (red) and cell-nuclei (blue). Scale bars = 100  $\mu\text{m}$ .

## Supporting Information Figure 6: Model Verification

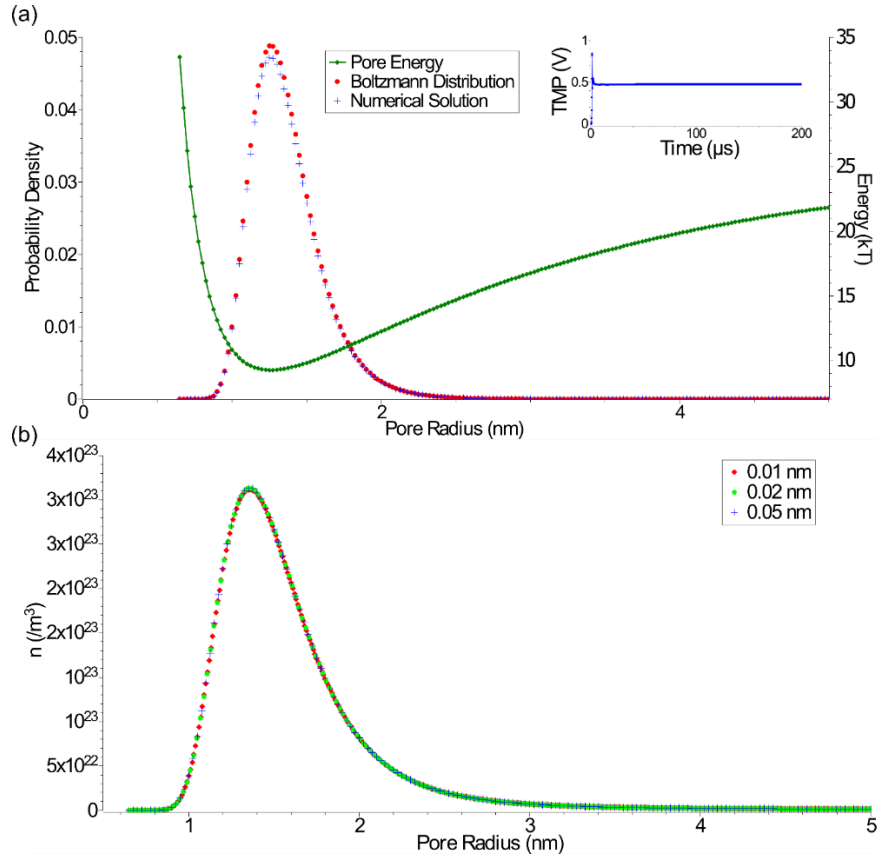

**Supporting Information Figure 6: Model Verification** (a) The normalized steady state pore distribution ( $n/\sum n$ ) obtained from the numerical simulation (200  $\mu$ s into the pulse) is plotted as a function of pore radius and compared to the analytical Boltzmann distribution ( $e^{-E/kT}/\sum e^{-E/kT}$ ) where,  $E$  is the hydrophilic pore energy (Eq. 2). Inset shows that the TMP has reached a steady state at 200  $\mu$ s. The steady state solution of the Smoluchowski equation is the Boltzmann distribution, and the analysis serves as a verification for the model, (b) The pore distribution ( $n$ ) at 50  $\mu$ s is plotted as a function of pore radius for different mesh sizes. The solution does not change with mesh size. The applied far-field voltage is 15 V for both the cases.

## Supporting Information Figure 7: Comparison of LEPD with Lipofectamine Transfection

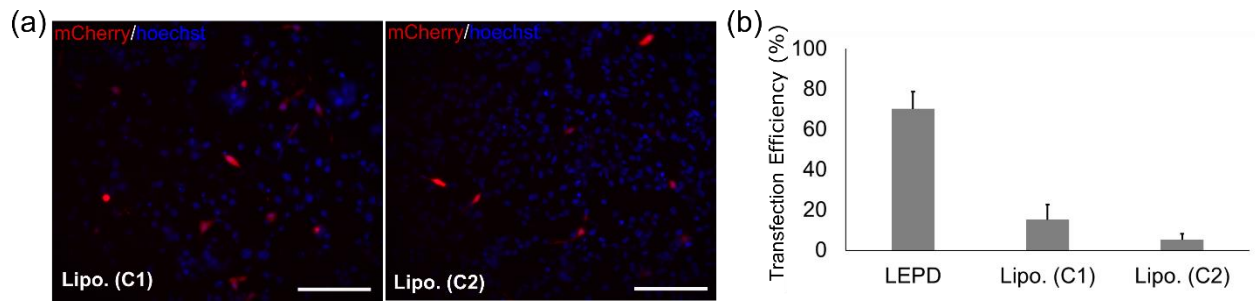

**Supporting Information Figure 7:** Comparison of LEPD with Lipofectamine Transfection (a) Transfection of mCherry plasmid in MDA-MB 231 cells using lipofectamine under two conditions. Left: Transfection using 0.3 µl of lipofectamine per 100 ng of DNA (C1). Right: Transfection using 0.15 µl of lipofectamine per 100 ng of DNA (C2). Scale Bars = 400 µm, (b) Comparison of transfection efficiencies for the LEPD (using 30 V pulse and hypo-osmolar buffer) and lipofectamine. N=3 for all cases.

## References

1. Son, R. S.; Gowrishankar, T. R.; Smith, K. C.; Weaver, J. C. Modeling a Conventional Electroporation Pulse Train: Decreased Pore Number, Cumulative Calcium Transport and an Example of Electrosensitization. *IEEE Trans. Biomed. Eng.* **2016**, *63*, 571-580.
2. Neu, J. C.; Krassowska, W. Asymptotic Model of Electroporation. *Phys. Rev. E* **1999**, *59*, 3471-3482.
3. Pastushenko, V. F.; Chizmadzhev, Y. A.; Arakelyan, V. B. 247 - Electric Breakdown of Bilayer Lipid Membranes II. Calculation of the Membrane Lifetime in the Steady-state Diffusion Approximation. *Bioelectrochem. Bioenerg.* **1979**, *6*, 53-62.
4. Neu, W. K.; Neu, J. C. Theory of Electroporation. In *Card. Bioelectr. Ther.: Mech. Pract. Implic.*; Efimov, I. R.; Kroll, M. W.; Tchou, P. J., Eds.; Springer US: Boston, MA, **2009**; pp 133-161.
5. Neu, J. C.; Smith, K. C.; Krassowska, W. Electrical Energy Required to Form Large Conducting Pores. *Bioelectrochemistry* **2003**, *60*, 107-114.
6. Vasilkoski, Z.; Esser, A. T.; Gowrishankar, T. R.; Weaver, J. C. Membrane Electroporation: The Absolute Rate Equation and Nanosecond Time Scale Pore Creation. *Phys. Rev. E* **2006**, *74*, 021904.
7. Renkin, E. M. Filtration, Diffusion, and Molecular Sieving Through Porous Cellulose Membranes. *J. Gen. Physiol.* **1954**, *38*, 225-243.
8. Bungay, P. M.; Brenner, H. The Motion of a Closely-Fitting Sphere in a Fluid-Filled Tube. *Int. J. Multiphase Flow* **1973**, *1*, 25-56.
9. Parsegian, A. Energy of an Ion Crossing a Low Dielectric Membrane: Solutions to Four Relevant Electrostatic Problems. *Nature* **1969**, *221*, 844.
10. Chernomordik, L. V.; Sukharev, S. I.; Popov, S. V.; Pastushenko, V. F.; Sokirko, A. V.; Abidor, I. G.; Chizmadzhev, Y. A. The Electrical Breakdown of Cell and Lipid Membranes: The Similarity of Phenomenologies. *Biochim. Biophys. Acta, Biomembr.* **1987**, *902*, 360-373.
11. Sten-Knudsen, O. *Biol. Membr.: Theory Transp., Potentials Electr. Impulses*; Cambridge University Press: Cambridge, **2002**; pp 180-190
